# Supplementary material for: The Effect of Topical Oxygen Therapy in Horses Affected with Mycosis of the Guttural Pouch: An Experimental Pilot Study and a Case Series
Source: MDPI journal article supplement (doi:10.3390/ani11113329), 2021-11-22
Supplement: s1 [file s1]

### Supplementary Item S3.

Kolmogorov-Smirnov test to evaluate the difference between treated and non-treated GP.

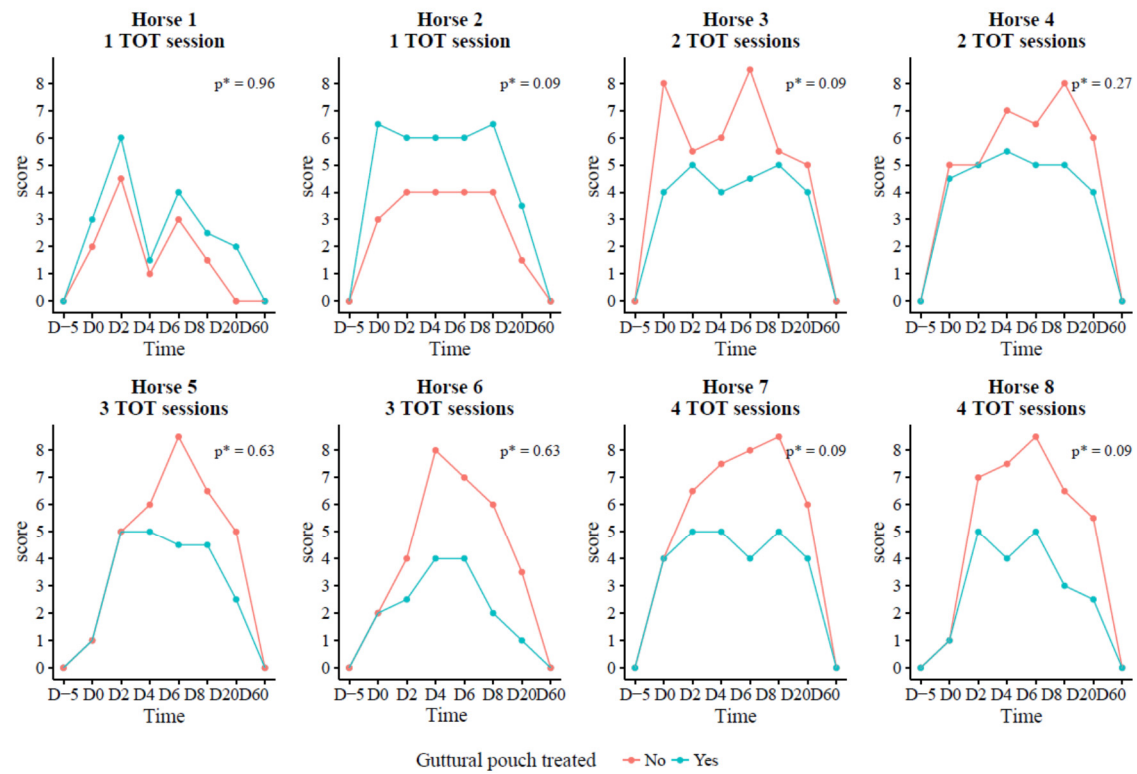

\* Kolmogorov-Smirnov test
