# Supplementary material for: The Effect of Topical Oxygen Therapy in Horses Affected with Mycosis of the Guttural Pouch: An Experimental Pilot Study and a Case Series
Source: MDPI journal article supplement (doi:10.3390/ani11113329), 2021-11-22
Supplement: s1 [file s1]

### Supplementary Item S1.

Agreement between six evaluators about endoscopic assessment of the guttural pouch at eight different time points.

| Evaluation period | $\alpha^{(1)}$ |
|-------------------|----------------|
| T 1 (D-5)         | 1              |
| T 2 (D0)          | 0,91           |
| T 3 (D2)          | 0,476          |
| T 4 (D4)          | 0,76           |
| T 5 (D6)          | 0,817          |
| T 6 (D8)          | 0,793          |
| T 7 (D20)         | 0,779          |
| T 8 (D60)         | 1              |

T = Time point of evaluation; D = day

<sup>(1)</sup>Krippendorff's alpha coefficient indicates a: poor ( $\alpha < 0$ ), slight ( $\alpha = 0$  to 0.2), fair ( $\alpha = 0.21$  to 0.40), moderate ( $\alpha = 0.41$  to 0.60), substantial ( $\alpha = 0.61$  to 0.80), and near perfect ( $\alpha = 0.81$  to 1) agreement.
