# Supplementary material for: The Effect of Topical Oxygen Therapy in Horses Affected with Mycosis of the Guttural Pouch: An Experimental Pilot Study and a Case Series
Source: MDPI journal article supplement (doi:10.3390/ani11113329), 2021-11-22
Supplement: s1 [file s1]

## Supplementary Item S2.

Endoscopic assessment of macroscopic inflammatory lesions by six evaluators for each of the eight-time points.

| Horse | GP | Time period (T) |          |          |          |          |          |           |           |
|-------|----|-----------------|----------|----------|----------|----------|----------|-----------|-----------|
|       |    | T1<br>D-5       | T2<br>D0 | T3<br>D2 | T4<br>D4 | T5<br>D6 | T6<br>D8 | T7<br>D20 | T8<br>D60 |
| 1     | R  | 0               | 2        | 5        | 0.9      | 3.2      | 1.5      | 0.5       | 0         |
|       | L* | 0               | 3.7      | 5.4      | 0.9      | 4.4      | 3.6      | 2         | 0         |
| 2     | R* | 0               | 6.1      | 5.4      | 6.5      | 6.5      | 6.9      | 3.7       | 0         |
|       | L  | 0               | 4        | 4        | 4.1      | 4.9      | 4.4      | 1.2       | 0         |
| 3     | R* | 0               | 6.9      | 5.1      | 4.2      | 4.5      | 5.1      | 4         | 0         |
|       | L  | 0               | 6.9      | 5.5      | 6.1      | 8.1      | 5.5      | 5.5       | 0         |
| 4     | R  | 0               | 5.3      | 5.5      | 6.6      | 6.6      | 8.1      | 5.9       | 0         |
|       | L* | 0               | 4.6      | 4.4      | 5.4      | 5.4      | 5.2      | 4.7       | 0         |
| 5     | R* | 0               | 1        | 5.1      | 5        | 4.4      | 5.1      | 2.7       | 0         |
|       | L  | 0               | 1        | 5.5      | 6        | 8.2      | 7        | 4.5       | 0         |
| 6     | R* | 0               | 2.5      | 2.7      | 4.2      | 3.4      | 1.9      | 0.9       | 0         |
|       | L  | 0               | 1.7      | 4.1      | 7.9      | 7        | 5.6      | 3.6       | 0         |
| 7     | R  | 0               | 4.5      | 6.2      | 7.6      | 7.9      | 9.4      | 5.6       | 0         |
|       | L* | 0               | 4        | 5        | 4.7      | 4.1      | 4.9      | 3.2       | 0         |
| 8     | R  | 0               | 1.1      | 7.1      | 7.1      | 8.6      | 7.6      | 5.5       | 0         |
|       | L* | 0               | 1        | 5        | 4        | 5        | 3.6      | 2.4       | 0         |

D = day; R = right guttural pouch; L= left guttural pouch; (\*) indicate the guttural pouch

treated. Gray colour of the cells indicates for each horse the time period of treatment and subsequently indicates if the horse had 1, 2, 3 or 4 TOT.
